# Supplementary material for: Enantiomeric pairs of ternary copper(ii) complexes and their aldol-type condensation products: synthesis, characterization, and anticancer and epigenetic properties
Source: Royal Society of Chemistry journal article supplement (doi:10.1039/c9dt00506d), 2019-01-01

**Supplementary figures and tables DT paper (NCH)**

1. ESI Table S1.1 and S1.2 (Crystallographic data and selected bond lengths and angles of **1**)  
ESI Tables S1.1

| Compound                                              | <b>1</b> [Cu(phen)(L-ser)(H <sub>2</sub> O)]NO <sub>3</sub>                                                                                  |
|-------------------------------------------------------|----------------------------------------------------------------------------------------------------------------------------------------------|
| Empirical formula                                     | C <sub>15</sub> H <sub>16</sub> Cu N <sub>4</sub> O <sub>7</sub>                                                                             |
| Formula weight                                        | 427.86                                                                                                                                       |
| Crystal system                                        | Triclinic                                                                                                                                    |
| Crystal size (mm)                                     | 0.34 x 0.34 x 0.38                                                                                                                           |
| Color                                                 | Blue                                                                                                                                         |
| Shape                                                 | Block                                                                                                                                        |
| Space group                                           | <i>P</i> 1 (No.1)                                                                                                                            |
| Unit cell dimensions (Å),(°)                          | <i>a</i> = 7.4893(3) <i>α</i> = 97.4994(16)<br><i>b</i> = 9.7967(4) <i>β</i> = 106.9521(16)<br><i>c</i> = 12.1077(5) <i>γ</i> = 107.5688(16) |
| Volume, (Å <sup>3</sup> )                             | 786.51(6)                                                                                                                                    |
| Z                                                     | 2                                                                                                                                            |
| $\rho_{\text{calc}}$ (g cm <sup>-3</sup> )            | 1.807                                                                                                                                        |
| $M\mu$ (mm <sup>-1</sup> )                            | 1.441                                                                                                                                        |
| F (000)                                               | 438                                                                                                                                          |
| Theta range for collection (°)                        | 2.53 – 27.18                                                                                                                                 |
| Radiation (MoK $\alpha$ ) (Å)                         | 0.71073                                                                                                                                      |
| Limiting Frequency                                    | -9 ≤ <i>h</i> ≤ 9<br>-11 ≤ <i>k</i> ≤ 12<br>-14 ≤ <i>l</i> ≤ 15                                                                              |
| Total reflections                                     | 11008                                                                                                                                        |
| Independent reflections                               | 5396                                                                                                                                         |
| Refinement method                                     | Full matrix least-squares refinement on <i>F</i> <sup>2</sup>                                                                                |
| Data/restraints/parameters                            | 5396/471/491                                                                                                                                 |
| Goodness of fit                                       | 1.072                                                                                                                                        |
| Final R indices [ <i>I</i> > 2 $\sigma$ ( <i>I</i> )] | 4.01%                                                                                                                                        |
| R indices (all data)                                  | 9.91%                                                                                                                                        |
| Largest diff. peak & hole (e Å <sup>3</sup> )         | 0.424 and -0.525                                                                                                                             |

## ESI Tables S1.2

## Bond Distances (Angstrom)

---

|         |          |         |          |
|---------|----------|---------|----------|
| Cu1-O1  | 1.934(5) | C5-C6   | 1.350(8) |
| Cu1-O7  | 2.275(4) | O6-C18  | 1.419(7) |
| Cu1-N1  | 1.998(5) | C6-C7   | 1.414(8) |
| Cu1-N2  | 2.027(5) | C7-C15  | 1.406(8) |
| Cu1-N3  | 2.013(5) | C7-C8   | 1.439(9) |
| Cu2-O4  | 1.938(4) | C8-C9   | 1.374(8) |
| Cu2-O8  | 2.265(4) | C9-C10  | 1.422(8) |
| Cu2-N4  | 1.998(5) | C10-C11 | 1.414(8) |
| Cu2-N5  | 2.018(5) | C10-C14 | 1.430(8) |
| Cu2-N6  | 2.005(5) | C11-C12 | 1.358(8) |
| O1-C1   | 1.286(7) | C12-C13 | 1.399(9) |
| O2-C1   | 1.232(6) | C14-C15 | 1.417(8) |
| O3-C3   | 1.431(6) | N4-C17  | 1.494(6) |
| N1-C2   | 1.483(6) | N2-C4   | 1.312(8) |
| N2-C15  | 1.374(8) | N3-C13  | 1.316(8) |
| N5-C30  | 1.355(8) | N3-C14  | 1.348(7) |
| N5-C19  | 1.338(8) | C1-C2   | 1.540(6) |
| N6-C29  | 1.370(7) | N6-C28  | 1.343(8) |
| C2-C3   | 1.516(6) | C25-C26 | 1.415(8) |
| O4-C16  | 1.271(7) | C26-C27 | 1.385(8) |
| C4-C5   | 1.411(9) | C27-C28 | 1.411(8) |
| O5-C16  | 1.239(6) | C29-C30 | 1.451(8) |
| O9-N7   | 1.242(7) | O10-N7  | 1.253(7) |
| O11-N7  | 1.255(7) | C16-C17 | 1.535(6) |
| C17-C18 | 1.511(6) | C19-C20 | 1.392(9) |
| C20-C21 | 1.386(8) | C21-C22 | 1.408(9) |
| C22-C30 | 1.395(8) | C22-C23 | 1.438(9) |
| C23-C24 | 1.351(8) | O12-N8  | 1.265(6) |
| C24-C25 | 1.446(8) | O13-N8  | 1.254(7) |

C25-C29 1.368(8) O14-N8 1.253(7)

---

---

Bond Angles (Degrees)

---

|             |           |             |            |
|-------------|-----------|-------------|------------|
| O1-Cu1-O7   | 96.64(17) | C3-O3-H3    | 109.00     |
| O1-Cu1-N1   | 84.4(2)   | O1-Cu1-N2   | 165.6(2)   |
| O1-Cu1-N3   | 91.13(19) | O7-Cu1-N1   | 96.23(18)  |
| O7-Cu1-N2   | 96.53(18) | O2-C1-C2    | 118.7(4)   |
| O7-Cu1-N3   | 93.09(18) | N1-Cu1-N2   | 100.0(2)   |
| N1-Cu1-N3   | 170.1(2)  | O1-C1-C2    | 116.6(4)   |
| N2-Cu1-N3   | 82.33(19) | O4-Cu2-N5   | 166.03(19) |
| O4-Cu2-N6   | 91.07(19) | O1-C1-O2    | 124.7(5)   |
| O8-Cu2-N4   | 96.65(18) | N1-C2-C1    | 109.0(3)   |
| O8-Cu2-N5   | 95.98(18) | N1-C2-C3    | 113.3(4)   |
| O8-Cu2-N6   | 93.34(18) | C1-C2-C3    | 111.4(4)   |
| O4-Cu2-O8   | 96.32(17) | O3-C3-C2    | 108.7(4)   |
| O4-Cu2-N4   | 85.1(2)   | N2-C4-C5    | 121.6(6)   |
| N5-Cu2-N6   | 81.63(19) | Cu2-O4-C16  | 116.3(3)   |
| N4-Cu2-N5   | 100.0(2)  | C4-C5-C6    | 120.8(6)   |
| N4-Cu2-N6   | 169.6(2)  | C5-C6-C7    | 119.0(5)   |
| Cu1-O1-C1   | 114.6(4)  | C6-C7-C15   | 117.3(5)   |
| Cu1-N1-C2   | 106.6(3)  | C6-C7-C8    | 124.1(5)   |
| Cu1-N2-C4   | 129.8(4)  | C8-C7-C15   | 118.6(5)   |
| Cu1-N2-C15  | 111.4(4)  | C7-C8-C9    | 120.4(6)   |
| C4-N2-C15   | 118.8(5)  | C8-C9-C10   | 121.6(6)   |
| Cu1-N3-C13  | 128.7(4)  | C9-C10-C14  | 118.9(5)   |
| Cu1-N3-C14  | 111.9(4)  | C11-C10-C14 | 115.8(5)   |
| C13-N3-C14  | 119.3(5)  | C9-C10-C11  | 125.3(5)   |
| C10-C11-C12 | 120.0(5)  | Cu2-N6-C29  | 114.1(4)   |
| C11-C12-C13 | 120.0(6)  | C28-N6-C29  | 117.9(5)   |
| N3-C13-C12  | 122.0(6)  | N3-C14-C15  | 118.0(5)   |
| C10-C14-C15 | 119.2(5)  | N3-C14-C10  | 122.7(5)   |

|             |          |             |          |
|-------------|----------|-------------|----------|
| C7-C15-C14  | 121.3(5) | N2-C15-C14  | 116.3(5) |
| N2-C15-C7   | 122.4(5) | Cu2-N4-C17  | 109.5(3) |
| Cu2-N5-C30  | 113.0(4) | C19-N5-C30  | 117.4(5) |
| O4-C16-O5   | 124.8(5) | Cu2-N5-C19  | 129.6(4) |
| O4-C16-C17  | 117.2(4) | O5-C16-C17  | 118.0(4) |
| C16-C17-C18 | 111.5(3) | N4-C17-C18  | 110.7(4) |
| N4-C17-C16  | 110.1(4) | Cu2-N6-C28  | 128.0(4) |
| O6-C18-C17  | 111.9(4) | N5-C19-C20  | 122.8(6) |
| C19-C20-C21 | 119.1(5) | C20-C21-C22 | 120.0(5) |
| C21-C22-C30 | 116.1(5) | C21-C22-C23 | 124.6(5) |
| C23-C22-C30 | 119.4(6) | C22-C23-C24 | 121.3(6) |
| C23-C24-C25 | 120.5(6) | C24-C25-C26 | 123.2(5) |
| C26-C25-C29 | 117.9(5) | C24-C25-C29 | 118.8(5) |
| C25-C26-C27 | 118.8(5) | C26-C27-C28 | 119.7(5) |
| N6-C28-C27  | 121.6(5) | N6-C29-C30  | 114.4(5) |
| C25-C29-C30 | 121.5(5) | N6-C29-C25  | 124.1(5) |
| C22-C30-C29 | 118.4(5) | N5-C30-C22  | 124.8(5) |
| N5-C30-C29  | 116.8(5) | O9-N7-O11   | 121.4(5) |
| O10-N7-O11  | 120.3(5) | O9-N7-O10   | 118.3(5) |
| O12-N8-O13  | 120.2(5) | O12-N8-O14  | 119.4(5) |
| O13-N8-O14  | 120.4(5) |             |          |

---

2. ESI Tables S2.1 and S2.2 (Crystallographic data and selected bond lengths and angles of **3**)

ESI Tables S2.1

|                                                |                                                                                                      |
|------------------------------------------------|------------------------------------------------------------------------------------------------------|
| Compound                                       | <b>3</b> L-[Cu(phen)(OCA)(H <sub>2</sub> O)]NO <sub>3</sub> ·H <sub>2</sub> O                        |
| Empirical formula                              | C <sub>16</sub> H <sub>18</sub> Cu N <sub>4</sub> O <sub>8</sub>                                     |
| Formula weight                                 | 457.88                                                                                               |
| Crystal system                                 | orthorhombic                                                                                         |
| Crystal size (mm)                              | 0.08 x 0.10 x 0.40                                                                                   |
| Color                                          | Blue                                                                                                 |
| Shape                                          | Needle                                                                                               |
| Space group                                    | P2 <sub>1</sub> 2 <sub>1</sub> 2 <sub>1</sub> (No.19)                                                |
| Unit cell dimensions (Å),(°)                   | <i>a</i> = 6.6836(3) α = 90.00<br><i>b</i> = 12.2756(4) β = 90.00<br><i>c</i> = 21.8809(8) γ = 90.00 |
| Volume, (Å <sup>3</sup> )                      | 1795.22(12)                                                                                          |
| Z                                              | 4                                                                                                    |
| ρ <sub>calc</sub> (g cm <sup>-3</sup> )        | 1.694                                                                                                |
| Mμ (mm <sup>-1</sup> )                         | 1.273                                                                                                |
| F (000)                                        | 940                                                                                                  |
| Temperature (K)                                | 103                                                                                                  |
| Theta range for collection (°)                 | 2.49 – 28.91                                                                                         |
| Radiation (MoKα) (Å)                           | 0.71073                                                                                              |
| Limiting frequency                             | -9 ≤ <i>h</i> ≤ 9<br>0 ≤ <i>k</i> ≤ 17<br>0 ≤ <i>l</i> ≤ 31                                          |
| Total reflections                              | 19885                                                                                                |
| Independent reflections                        | 5710 [R(int) = 3.93%]                                                                                |
| Refinement method                              | Full matrix least-squares refinement on F <sup>2</sup>                                               |
| Data/restraints/parameters                     | 5708/6/277                                                                                           |
| Goodness of fit                                | 1.021                                                                                                |
| Final R indices [ <i>I</i> > 2 σ ( <i>I</i> )] | 6955 [4.988° < 2θ < 57.82°]                                                                          |
| R indices (all data)                           | R1 = 3.16%, wR2 = 9.26%                                                                              |
| Largest diff. peak & hole (e Å <sup>-3</sup> ) | 0.601 and 0.649                                                                                      |

## ESI Tables S2.2

**Bond Distances (Å)**

---

|        |            |         |          |
|--------|------------|---------|----------|
| Cu1-O1 | 1.9464(13) | C7-C8   | 1.411(2) |
| Cu1-O4 | 2.2805(14) | C8-C16  | 1.406(2) |
| Cu1-N1 | 2.0001(15) | C8-C9   | 1.433(2) |
| Cu1-N2 | 2.0253(14) | C9-C10  | 1.356(2) |
| Cu1-N3 | 1.9826(13) | C10-C11 | 1.440(2) |
| O1-C2  | 1.273(2)   | C11-C15 | 1.400(2) |
| O2-C2  | 1.240(2)   | C11-C12 | 1.405(2) |
| O3-C3  | 1.428(2)   | C12-C13 | 1.375(3) |
| O3-C4  | 1.421(2)   | C13-C14 | 1.397(3) |
| N1-C1  | 1.485(2)   | C15-C16 | 1.435(2) |
| N1-C4  | 1.479(3)   | N2-C5   | 1.333(2) |
| N2-C16 | 1.357(2)   | N3-C14  | 1.326(2) |
| N3-C15 | 1.357(2)   | C1-C3   | 1.545(3) |
| C1-C2  | 1.532(2)   | C5-C6   | 1.405(3) |
| O5-N4  | 1.246(2)   | C6-C7   | 1.369(3) |
| O6-N4  | 1.235(2)   | O7-N4   | 1.254(2) |

---

**Bond Angles (Degrees)**

---

|           |           |            |            |
|-----------|-----------|------------|------------|
| O1-Cu1-O4 | 92.33(6)  | C1-N1-H1N  | 107.7(14)  |
| O1-Cu1-N1 | 84.86(6)  | Cu1-N1-H1N | 110.5(13)  |
| O1-Cu1-N2 | 174.05(6) | O2-C2-C1   | 117.96(16) |
| O1-Cu1-N3 | 92.31(5)  | O1-C2-C1   | 116.63(15) |
| O4-Cu1-N1 | 86.70(7)  | O1-C2-O2   | 125.40(16) |
| O4-Cu1-N2 | 87.04(7)  | O3-C3 -C1  | 105.50(14) |
| O4-Cu1-N3 | 105.12(7) | O3-C4-N1   | 104.96(17) |
| N1-Cu1-N2 | 101.01(6) | N2-C5-C6   | 121.95(17) |

---

|            |            |             |            |
|------------|------------|-------------|------------|
| N1-Cu1-N3  | 167.97(8)  | C5-C6-C7    | 120.00(16) |
| N2-Cu1-N3  | 82.16(5)   | C6-C7-C8    | 119.62(17) |
| Cu1-O1-C2  | 115.14(12) | C7-C8-C16   | 116.43(15) |
| C3-O3-C4   | 105.75(14) | C7-C8-C9    | 124.98(16) |
| Cu1-N1-C1  | 106.83(11) | C9-C8-C16   | 118.59(15) |
| Cu1-N1-C4  | 117.65(12) | C8-C9-C10   | 121.77(16) |
| C1-N1-C4   | 103.03(14) | C9-C10-C11  | 120.79(16) |
| Cu1-N2-C5  | 129.86(12) | C12-C11-C15 | 117.43(16) |
| Cu1-N2-C16 | 111.44(10) | C10-C11-C12 | 124.23(16) |
| C5-N2-C16  | 118.04(15) | C10-C11-C15 | 118.34(16) |
| Cu1-N3-C14 | 128.57(12) | C11-C12-C13 | 118.99(17) |
| Cu1-N3-C15 | 113.29(11) | C12-C13-C14 | 119.74(16) |
| C14-N3-C15 | 118.14(15) | N3-C14-C13  | 122.47(17) |
| N3-C15-C16 | 115.92(15) |             |            |
| Cu1-O4-H2O | 120.0(15)  | N3-C15-C11  | 123.18(16) |
| Cu1-O4-H1O | 124.7(19)  | C11-C15-C16 | 120.90(15) |
| C2-C1-C3   | 112.53(15) | C8-C16-C15  | 119.54(15) |
| N1-C1-C3   | 104.52(15) | N2-C16-C8   | 123.96(14) |
| N1-C1-C2   | 110.78(14) | N2-C16-C15  | 116.50(14) |
| O6-N4-O7   | 119.00(16) | O5-N4-O6    | 120.23(17) |
| O5-N4-O7   | 120.77(16) |             |            |

3. ESI Table S3 (UV-Visible Absorption)

| Complex                                                  | $\lambda_{\text{max}}$ (nm), $\epsilon(\text{mol}^{-1}\text{dm}^3 \text{cm}^{-1})$ | Assignment              |
|----------------------------------------------------------|------------------------------------------------------------------------------------|-------------------------|
| L-[Cu(phen)(L-ser)(H <sub>2</sub> O)]NO <sub>3</sub> (1) | 224 (34 007)                                                                       | $\pi \rightarrow \pi^*$ |
|                                                          | 273 (32 862)                                                                       | $\pi \rightarrow \pi^*$ |
|                                                          | 613 (62)                                                                           | d-d                     |
| D-[Cu(phen)(D-ser)(H <sub>2</sub> O)]NO <sub>3</sub> (2) | 224 (35 173)                                                                       | $\pi \rightarrow \pi^*$ |
|                                                          | 273 (33 960)                                                                       | $\pi \rightarrow \pi^*$ |
|                                                          | 613 (62)                                                                           | d-d                     |
| L-[Cu(phen)(OCA)(H <sub>2</sub> O)]NO <sub>3</sub> (3)   | 224 (33 423)                                                                       | $\pi \rightarrow \pi^*$ |
|                                                          | 273 (32 147)                                                                       | $\pi \rightarrow \pi^*$ |
|                                                          | 623 (62)                                                                           | d-d                     |
| D-[Cu(phen)(OCA)(H <sub>2</sub> O)]NO <sub>3</sub> (4)   | 225 (65 870)                                                                       | $\pi \rightarrow \pi^*$ |
|                                                          | 273 (62 897)                                                                       | $\pi \rightarrow \pi^*$ |
|                                                          | 622 (62)                                                                           | d-d                     |

4. ESI Figure S1

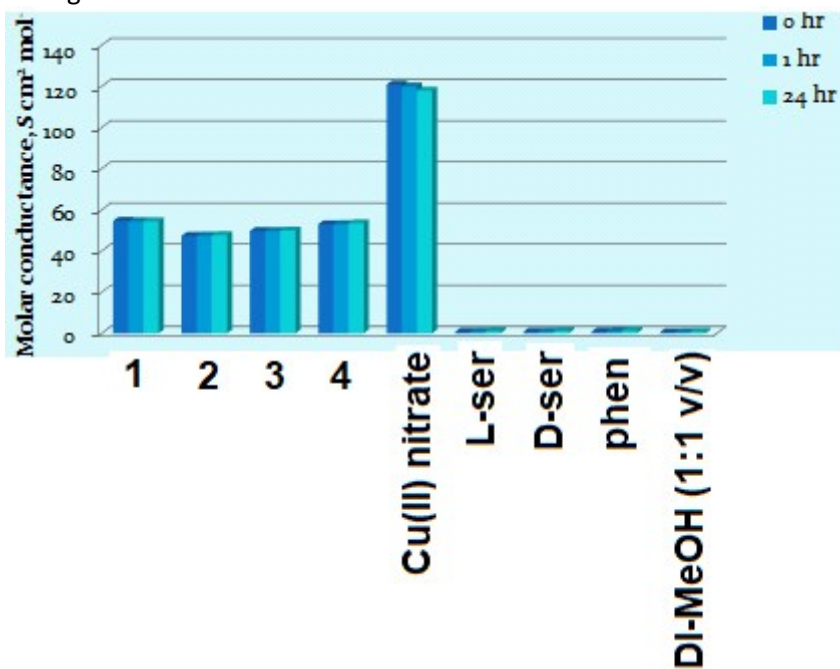



5. ESI Fig. S2.1–S2.4 (Electrospray Ionization-Mass spectra)

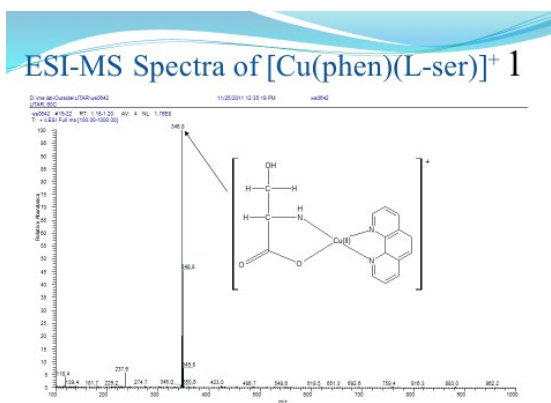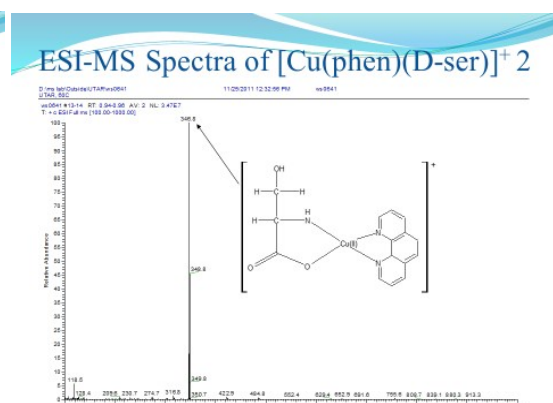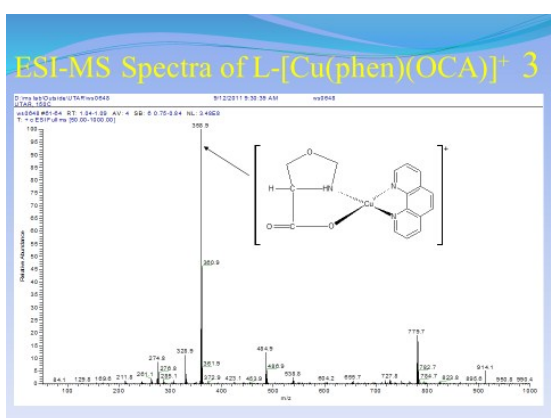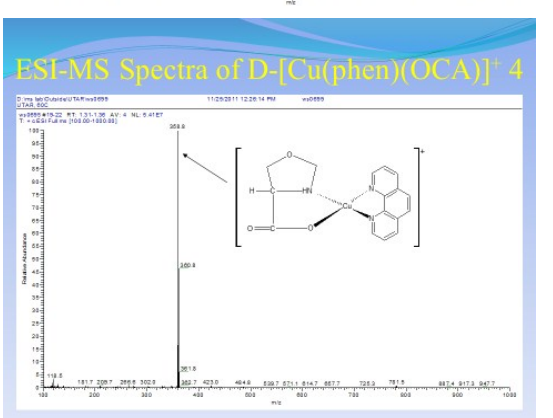

6. ESI Fig. S3 (Fluorescence emission)

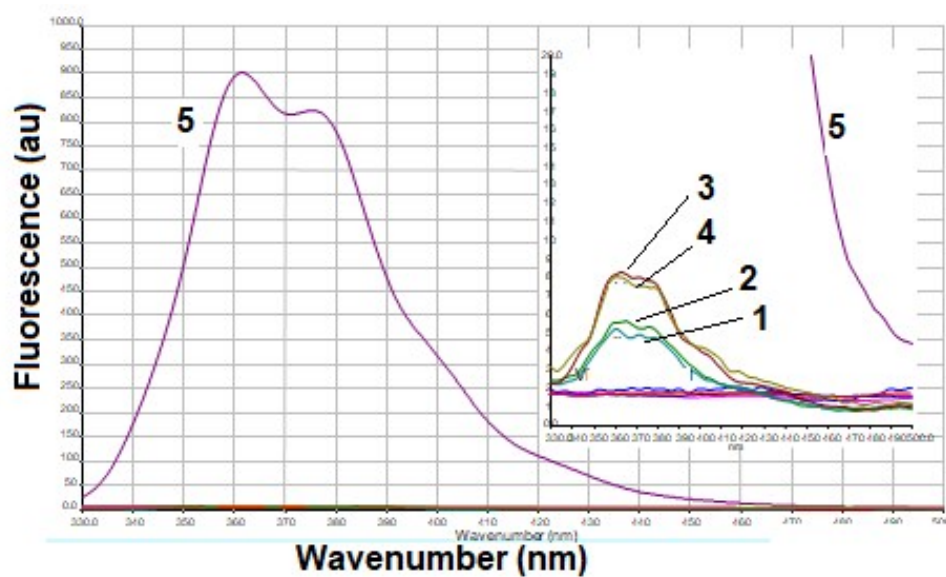

Supplement: c9dt00506d1.pdf [file c9dt00506d1.pdf]
